# Supplementary material for: Inhibition of O-GlcNAc transferase sensitizes prostate cancer cells to docetaxel
Source: PubMed Central journal article supplement (PMC9686342; doi:10.3389/fonc.2022.993243), 2022-11-10
Supplement: DataSheet_1.pdf [file DataSheet_1.pdf]

# **Inhibition of O-GlcNAc transferase sensitizes prostate cancer cells to docetaxel**

Mingyue Xia<sup>§</sup>, Shuyan Wang<sup>§</sup>, Yannan Qi<sup>§</sup>, Kaili Long, Enjie Li, Lingfeng He,  
Feiyan Pan, Zhigang Guo, Zhigang Hu\*

<sup>1</sup>Jiangsu Key Laboratory for Molecular and Medical Biotechnology, College of Life Sciences, Nanjing Normal University, Nanjing210023, China

## **Supplementary Information**

The following file contains supplementary material for the paper “Inhibition of O-GlcNAc transferase sensitizes prostate cancer cells to docetaxel”.

This file is composed of:

Supplementary tables (3 tables)

Supplementary figures and relative supplementary figure legends (6 figures)

**Supplementary table 1. Sequences of the primers used in this study.**

| Name  | Oligonucleotide sequence                                           | Application                                  |
|-------|--------------------------------------------------------------------|----------------------------------------------|
| OGT   | F:CGCGGATCCGAAGCTCCAGATGGCGTCTTC                                   | Primers used<br>for QRT-PCR                  |
|       | R:ATTTGCGGCCCGCCATGCTGACTCAGTGA<br>CTT<br>CAAC                     |                                              |
| GAPDH | F:GTCTCCTCTGACTTCAACAGCG                                           |                                              |
|       | R:ACCACCCTGTTGCTGTAGCCAA                                           |                                              |
| OGT   | F:GATCCGGTTCTGCCTTCTGGACAATGTGCTT<br>TTGTCCAGAAGGCAGAACCTTTT<br>TA | Primers used<br>for Plasmids<br>construction |
|       | R:CGCGTAAAAAGGTTCTGCCTTCTGGACAAA<br>AGCACATTGTCCAGAAGGCAGAACCG     |                                              |

**Supplementary table 2. Antibodies used in this study.**

| Antibody                    | Source                    | Identifier      | Additional information |
|-----------------------------|---------------------------|-----------------|------------------------|
| Rabbit polyclonal anti-TBB5 | ABclonal                  | Cat# A11577     | WB(1:1000)             |
| Monoclonal anti-BAX         | Cell Signaling Technology | Cat# 80,312 S   | WB(1:1000)             |
| Ployclonal anti-caspase3    | ABclonal                  | Cat# A11550     | WB(1:1000)             |
| Rabbit polyclonal anti-OGT  | proteintech               | Cat# 11576-2-AP | WB(1:1000)             |

**Supplementary table 3. Analysis of miRNAs target to OGT 3' UTR.**

1 and 0 represent the positive and negative results analysed by bioinformatics tools, respectively.

| miRNAs      | TargetScan | PicTar | miRcode | Starbase | SUM |
|-------------|------------|--------|---------|----------|-----|
| miR-140-5p  | 1          | 1      | 1       | 1        | 4   |
| miR-24-3p   | 1          | 1      | 1       | 1        | 4   |
| miR-204-5p  | 1          | 1      | 0       | 1        | 3   |
| miR-141-3p  | 1          | 1      | 0       | 1        | 3   |
| miR-181-5p  | 1          | 1      | 0       | 1        | 3   |
| miR-182-5p  | 1          | 1      | 0       | 1        | 3   |
| miR-145-5p  | 1          | 0      | 0       | 1        | 2   |
| miR-200a-3p | 1          | 1      | 0       | 0        | 2   |
| miR-202-5P  | 1          | 0      | 0       | 0        | 1   |

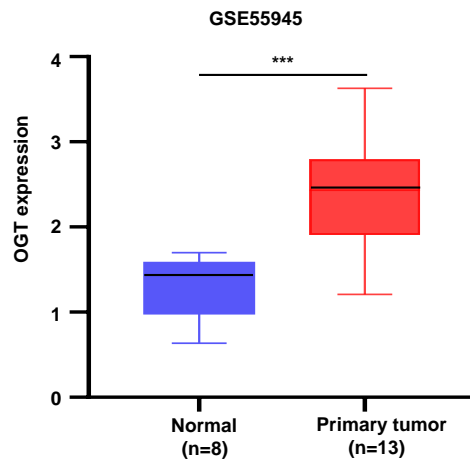

**Supplementary Fig. 1.** The relative expression level of OGT in publicly-available data from Gene Expression Omnibus (GEO). \*\*\*  $p < 0.001$  (Student's t-test).

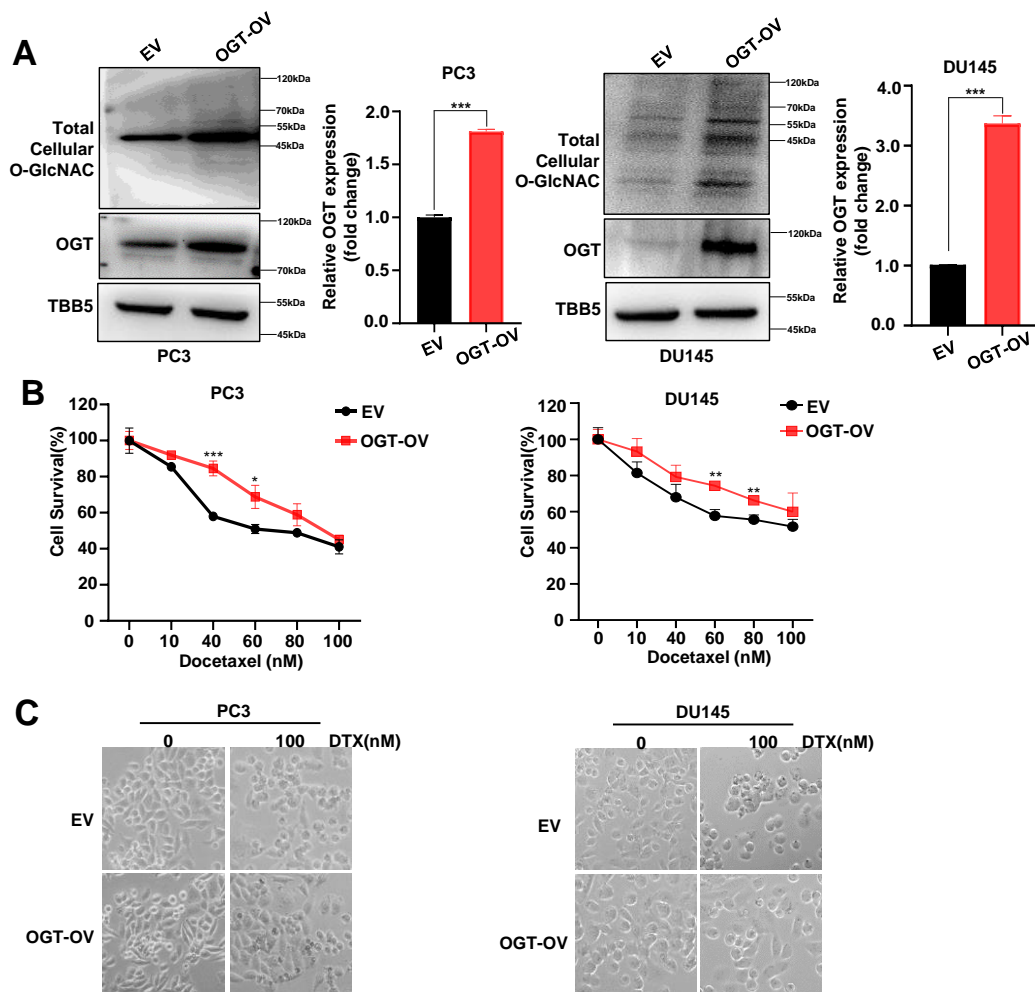

**Supplementary Fig. 2.** Overexpressing OGT could significantly reduce the drug sensitivity of PC cells to docetaxel.

(A) Western blot was used to validate of the up-regulation of OGT protein and O-GlcNAc levels. \*\*\*  $p < 0.001$  (Student's t-test). (B) CCK8 assays were used to detect docetaxel sensitivity in OGT-overexpressing PC3 and DU145 cell lines. Data are expressed as the mean  $\pm$  standard deviation (SD),  $n = 3$  per group. (C) Morphological analysis of control and OGT-overexpressing cells treated with docetaxel.

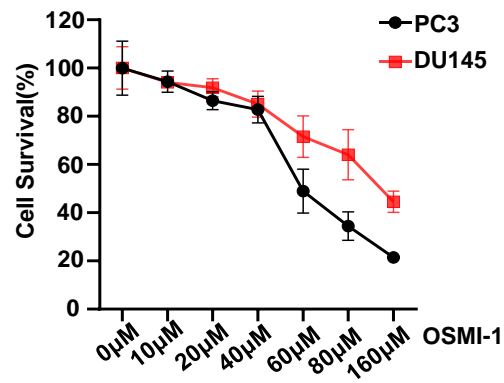

**Supplementary Fig. 3.** CCK8 assay to detect the IC50 of OSMI-1 in PC3 and DU145 cells.

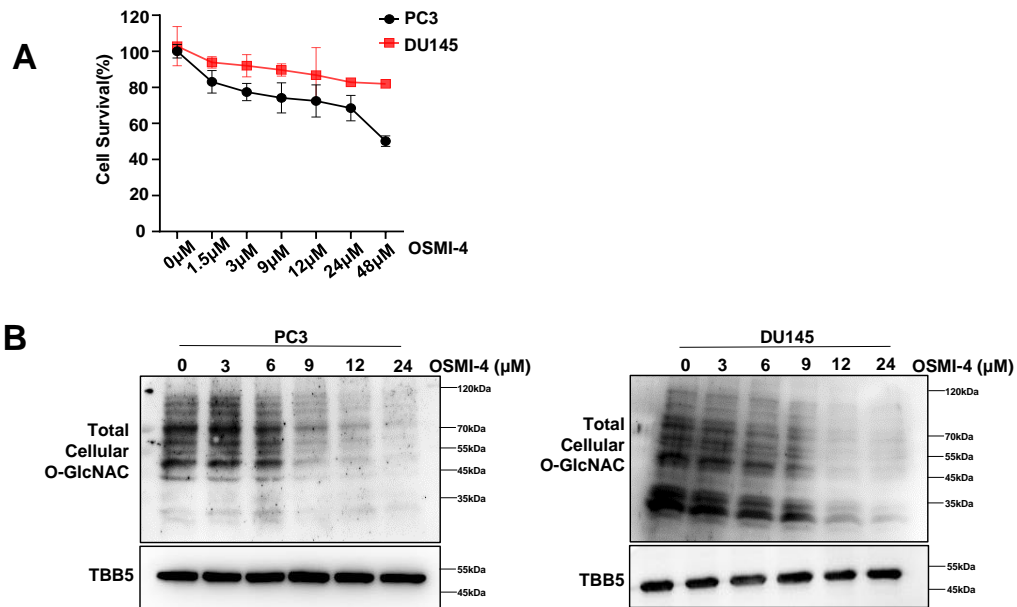

**Supplementary Fig. 4.** (A) CCK8 assay to detect the IC50 of OSMI-4 in PC3 and DU145 cells. (B) Western blot assays were used to detect the changes of O-GlcNacylation expression in PC3 and DU145 cell lines under different concentrations of OSMI-4 treatment.



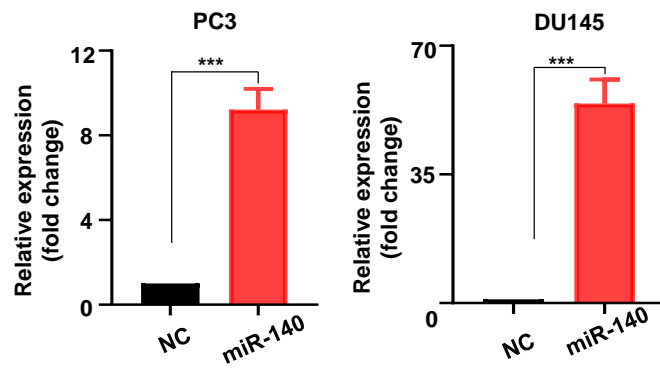

**Supplementary Fig. 5.** qRT-PCR was used to validate of the efficiency of miR-140 overexpression. \*\*\*  $p < 0.001$  (Student's t-test).

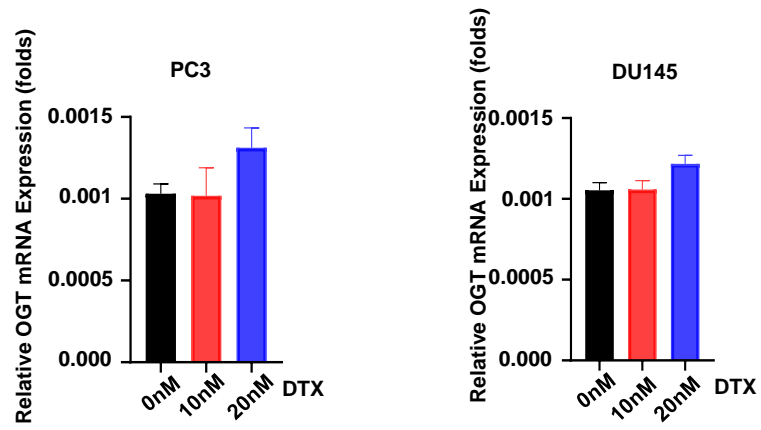

**Supplementary Fig. 6.** The mRNA expression levels of OGT in PC3 and DU145 cell lines under docetaxel treatment were detected by RT-qPCR.
